# Supplementary material for: Alzheimer’s and Parkinson’s Diseases in Relation to Human Papillomavirus Infection: A Two-Sample Mendelian Randomization Study
Source: Research Square preprint supplement (doi:10.21203/rs.3.rs-6094175/v1), 2025-03-03
Supplement: Supplementary file 1 [file 704311af5db26d30232a58e1.docx]

Supplementary Material

# Supplementary Figures and Tables

## Supplementary Figure


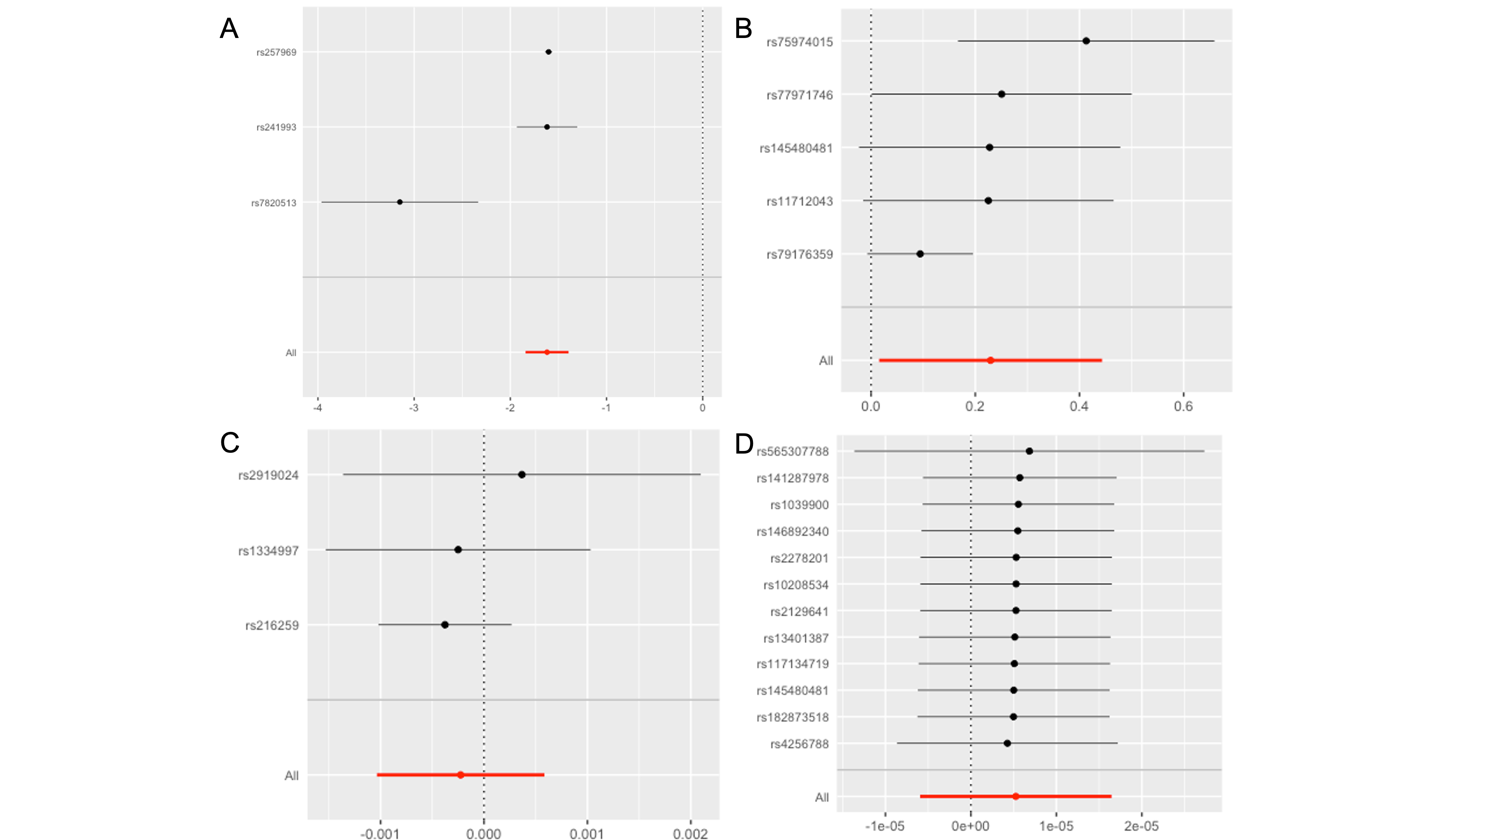


**Supplementary Figure 1.** The MR leave-one-out sensitivity analysis. Forest plots of each SNP and total effect of (A) the HPV18 E7 exposure dataset on PD; (B) the HPV seropositivity dataset on PD; (C) the HPV16 E7 exposure dataset on AD; (D) the HPV seropositivity dataset on AD. AD = Alzheimer’s Diseases, PD = Parkinson’s Diseases, MR = Mendelian Randomization.

## Supplementary Tables

| **Supplementary Table 1.** Causal Effect between HPV-related indicators and Parkinson’s diseases/Alzheimer’s diseases. | | | | | | | |
| --- | --- | --- | --- | --- | --- | --- | --- |
| **Exposure** | **Main outcome** | **Method** | **nSNP** | **P value** | **OR (95%CI)** | **95%CI (lower bound)** | **95%CI (upper bound)** |
| HPV16 E7 protein | Parkinson’s Disease | Wald ratio | 1 | 0 | 2.392014 | 2.352295 | 2.432404 |
| HPV18 E7 protein | MR Egger | 3 | 1.85E-01 | 151.5892403 | 7.96733095 | 2884.190192 |
| Weighted median | 3 | 1.15E-05 | 0.1695627 | 0.07673858 | 0.3746681 |
| Inverse variance weighted | 3 | 1.17E-45 | 0.1982535 | 0.15852539 | 0.2479379 |
| Simple mode | 3 | 1.73E-01 | 0.2534995 | 0.06955275 | 0.9239322 |
| Weighted mode | 3 | 4.78E-02 | 0.1890349 | 0.09014225 | 0.3964199 |
| Inverse variance weighted (multiplicative random effects) | 3 | 1.17E-45 | 0.1982535 | 0.1585254 | 0.2479379 |
| HPV seropositivity | MR Egger | 5 | 0.574723012 | 0.967367 | 0.8721691 | 1.072956 |
| Weighted median | 5 | 0.001320637 | 1.052621 | 1.0201853 | 1.086088 |
| Inverse variance weighted | 5 | 0.03557705 | 1.257932 | 1.0155944 | 1.558095 |
| Simple mode | 5 | 0.020846841 | 1.198626 | 1.0889189 | 1.319386 |
| Weighted mode | 5 | 0.004393674 | 1.055646 | 1.0365044 | 1.07514 |
| Inverse variance weighted (multiplicative random effects) | 5 | 0.03557705 | 1.257932 | 1.0155944 | 1.558095 |
| HPV16 E7 protein | Alzheimer’s Disease | MR Egger | 3 | 0.558221 | 0.9993227 | 0.9977291 | 1.000919 |
| Weighted median | 3 | 0.3537053 | 0.9996476 | 0.9989032 | 1.000393 |
| Inverse variance weighted | 3 | 0.5848437 | 0.9997743 | 0.9989649 | 1.000584 |
| Simple mode | 3 | 0.6135296 | 0.9997064 | 0.998736 | 1.000678 |
| Weighted mode | 3 | 0.3592605 | 0.9996122 | 0.9989685 | 1.000256 |
| Inverse variance weighted (fixed effects) | 3 | 0.4771735 | 0.9997743 | 0.9991522 | 1.000397 |
| HPV18 E7 protein | Wald ratio | 1 | 0.5972339 | 0.9997752 | 0.9989419 | 1.000609 |
| HPV seropositivity | MR Egger | 12 | 0.3178857 | 1.000009 | 0.9999924 | 1.000025 |
| Weighted median | 12 | 0.4105723 | 1.000005 | 0.9999925 | 1.000018 |
| Inverse variance weighted | 12 | 0.3575456 | 1.000005 | 0.9999941 | 1.000016 |
| Simple mode | 12 | 0.6039933 | 1.000011 | 0.9999695 | 1.000053 |
| Weighted mode | 12 | 0.3737605 | 1.000006 | 0.9999935 | 1.000018 |
| Note: CI, confidence interval; HPV, Human papillomavirus; nSNP, number of single nucleotide polymorphisms; OR, Odds ratio. | | | | | | | |

| **Supplementary Table 2.** The sensitivity analysis of the results of HPV and AD/PD MR analysis. | | | | | | | |
| --- | --- | --- | --- | --- | --- | --- | --- |
| **Exposure** | **Main outcome** | **Method** | **Cochran’s Q-Test.p** | **MR.Egger.p** | **MR.Egger.Intercept.p** | **MR.PRESSO.Global.Test.p** | **Horizontal Pleiotropy test.p** |
| HPV18 E7 protein | Parkinson’s Disease | MR Egger | 5.23E-02 | 1.00E-03 | 0 | NA | 0.14169 |
| Inverse variance weighted | 1.65E-17 |
| HPV seropositivity | MR Egger | 0 | 0.53 | 0 | 0.064 | 0.007827994 |
| Inverse variance weighted | 0.53 |
| HPV16 E7 protein | Alzheimer’s Disease | MR Egger | 0.1295 | 0.405 | 0.492 | NA | 0.61641 |
| Inverse variance weighted | 0.18396 |
| HPV seropositivity | MR Egger | 0.6939953 | 0.331 | 0.646 | 0.89 | 0.5742026 |
| Inverse variance weighted | 0.7427793 |
| AD, Alzheimer’s Disease; HPV, Human papillomavirus; MR, Mendelian Randomization; PD, Parkinson’s Disease. | | | | | | | |
